# Supplementary material for: Synthesis and properties of pure and intergrown CHA/PHI zeolites from inorganic multi-cation colloidal suspensions
Source: Royal Society of Chemistry journal article supplement (doi:10.1039/d4qi02808b), 2025-01-01
Supplement: d4qi02808b1.pdf [file d4qi02808b1.pdf]

## Supporting Information:

### Synthesis and properties of pure and intergrown CHA/PHI zeolites from inorganic multi-cation colloidal suspensions

Aymeric Magisson,<sup>a</sup> Edwin B. Clatworthy,<sup>\*a</sup> Diógenes Honorato Piva,<sup>a</sup> Sajjad Ghojavand,<sup>a</sup> Oleg I. Lebedev<sup>b</sup> and Svetlana Mintova<sup>\*a</sup>

<sup>a</sup>Université de Caen Normandie, ENSICAEN, CNRS, LCS, Laboratoire Catalyse et Spectrochimie, 14000 Caen, France

<sup>b</sup>Université de Caen Normandie, ENSICAEN, CNRS, CRISMAT, Laboratoire de Cristallographie et Sciences des Matériaux, 14000 Caen, France

#### Additional figures and tables

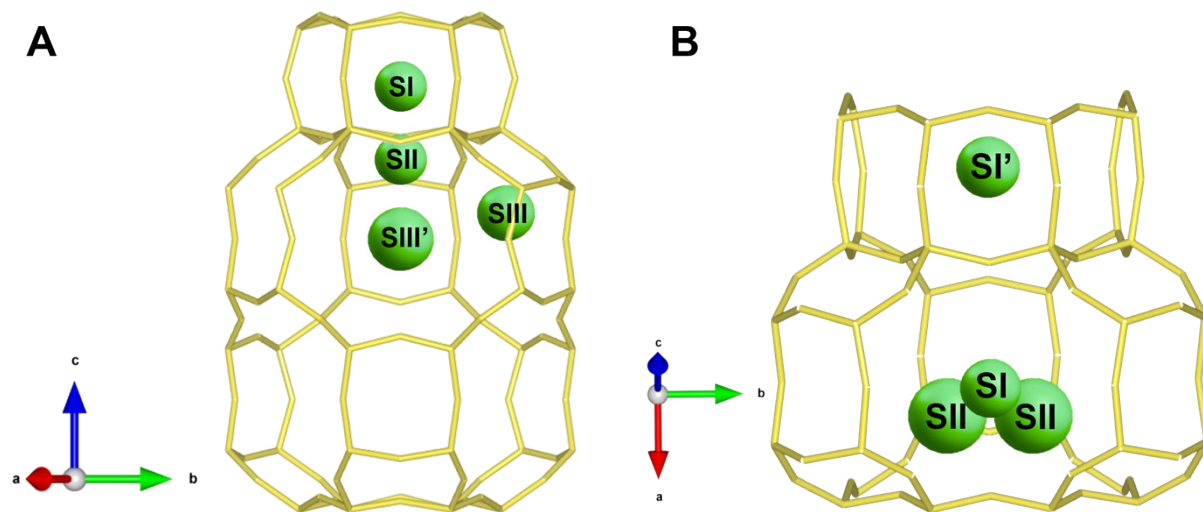

**Figure S1.** Extra-framework cations site location in the chabazite (A) and in the phillipsite (B). The structures are viewed as a projection along  $[\bar{1}00]$ .

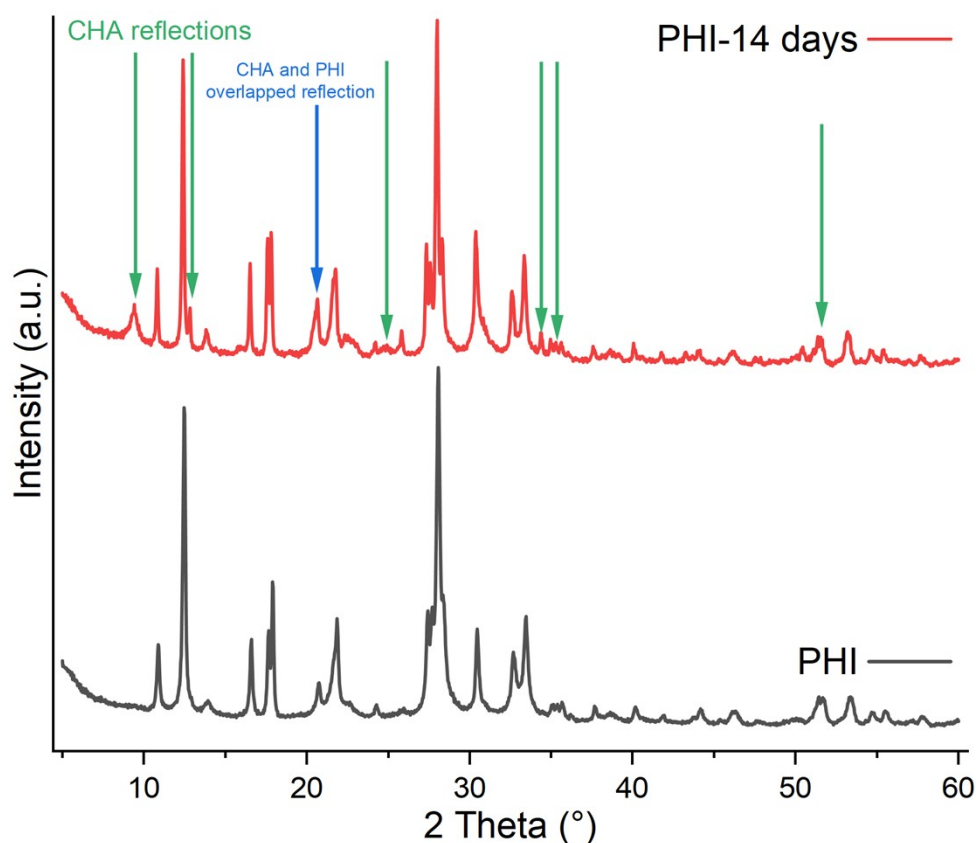

**Figure S2.** Powder XRD pattern of a chabazite/phillipsite zeolite compared to the pattern of a pure phillipsite pattern. The green arrows indicate peaks attributed to the CHA phase and the blue arrow indicates an overlapped CHA and PHI peak.

**Table S1.** Screening of the synthesis parameters yielding pure CHA, PHI and intergrown zeolites.

|                                        | Chemical composition |                  |                   |     |     |                  |                                |                  | Crystallisation    |             | Zeolitic product |         |
|----------------------------------------|----------------------|------------------|-------------------|-----|-----|------------------|--------------------------------|------------------|--------------------|-------------|------------------|---------|
|                                        | Cs <sub>2</sub> O    | K <sub>2</sub> O | Na <sub>2</sub> O | BaO | CaO | SiO <sub>2</sub> | Al <sub>2</sub> O <sub>3</sub> | H <sub>2</sub> O | Ageing time (days) | HT time (h) | XRD phase        | CHA/PHI |
| (1) CHA <sup>42</sup>                  | 0.2                  | 1.5              | 6                 | -   | -   | 16               | 0.7                            | 140              | 7                  | 7           | CHA              | 1       |
| (2) Chabazite <sup>40</sup>            | 0.15                 | 1.35             | 6                 | -   | -   | 16               | 0.6                            | 120              | 12                 | 8           | CHA              | 1       |
| (3) CHA-Na,Cs-1.3K,0.2Ba <sup>42</sup> | 0.2                  | 1.3              | 6                 | 0.2 | -   | 16               | 0.7                            | 140              | 7                  | 7           | CHA              | 1       |
| (4) CHA-Na,K,Cs-0.2Ca <sup>42</sup>    | 0.2                  | 1.5              | 6                 | -   | 0.2 | 16               | 0.7                            | 140              | 7                  | 10          | CHA              | 1       |
| (5) CHA-Na,K,Cs-0.2Ba <sup>42</sup>    | 0.2                  | 1.5              | 6                 | 0.2 | -   | 16               | 0.7                            | 140              | 7                  | 4           | CHA              | 1       |
| (6) CHA-Na,K                           | -                    | 1.5              | 6                 | -   | -   | 16               | 0.7                            | 140              | 7                  | 7           | CHA              | 1       |
| (7) CHA-Na,Cs-1.3K,0.2Ca <sup>42</sup> | 0.2                  | 1.3              | 6                 | -   | 0.2 | 16               | 0.7                            | 140              | 7                  | 7           | CHA & PHI        | 0.81    |
| (8) CHA-Na,K,Cs-0.50Al                 | 0.2                  | 1.5              | 6                 | -   | -   | 16               | 0.5                            | 140              | 7                  | 7           | CHA & PHI        | 0.74    |
| (9) CHA-Na,K,Cs-0.25Al                 | 0.2                  | 1.5              | 6                 | -   | -   | 16               | 0.25                           | 140              | 7                  | 7           | CHA & PHI        | 0.69    |
| (10) CHA-Na,K,Cs-0.5Ba                 | 0.2                  | 1.5              | 6                 | 0.5 | -   | 16               | 0.7                            | 140              | 7                  | 4           | CHA & PHI        | 0.59    |
| (11) CHA-Na,K,Cs-1.0Ba                 | 0.2                  | 1.5              | 6                 | 1   | -   | 16               | 0.7                            | 140              | 7                  | 4           | CHA & PHI        | 0.42    |
| (12) PHI                               | -                    | 1.5              | 6                 | -   | 0.2 | 16               | 0.7                            | 140              | 7                  | 7           | PHI              | 0       |
| (13) PHI-14 days *                     | -                    | 1.5              | 6                 | -   | 0.2 | 16               | 0.7                            | 140              | 14                 | 7           | CHA & PHI        | 0.29    |

\* The suffix "14 days" refers to the ageing time that was prolonged for fourteen days instead of seven

**Table S2A.** Scherrer crystalline domain size calculation of the PHI-14 days sample. The Miller indices were chosen to average out over crystal orientation and not overlap with those of chabazite.

| h,k,l | B obs.<br>[° 2 $\theta$ ] | B std.<br>[° 2 $\theta$ ] | Peak pos.<br>[° 2 $\theta$ ] | B struct.<br>[° 2 $\theta$ ] | Crystallite size [Å] |
|-------|---------------------------|---------------------------|------------------------------|------------------------------|----------------------|
| 100   | 0.121                     | 0.003                     | 10.806                       | 0.118                        | 676                  |
| 020   | 0.148                     | 0.003                     | 12.392                       | 0.145                        | 551                  |
| 120   | 0.108                     | 0.003                     | 16.505                       | 0.105                        | 765                  |
| 22-1  | 0.144                     | 0.003                     | 21.855                       | 0.141                        | 574                  |
| 14-2  | 0.18                      | 0.003                     | 32.566                       | 0.177                        | 468                  |
| 34-2  | 0.108                     | 0.003                     | 37.57                        | 0.105                        | 799                  |
|       |                           |                           |                              |                              | average: 64±13 nm    |

**Table S2B.** Scherrer crystalline domain size calculation of the PHI sample.

| h,k,l | B obs.<br>[° 2 $\theta$ ] | B std.<br>[° 2 $\theta$ ] | Peak pos.<br>[° 2 $\theta$ ] | B struct.<br>[° 2 $\theta$ ] | Crystallite size [Å] |
|-------|---------------------------|---------------------------|------------------------------|------------------------------|----------------------|
| 100   | 0.144                     | 0.003                     | 10.879                       | 0.141                        | 566                  |
| 020   | 0.18                      | 0.003                     | 12.476                       | 0.177                        | 452                  |
| 120   | 0.144                     | 0.003                     | 16.581                       | 0.141                        | 569                  |
| 22-1  | 0.144                     | 0.003                     | 21.855                       | 0.141                        | 574                  |
| 14-2  | 0.252                     | 0.003                     | 32.632                       | 0.249                        | 332                  |
| 34-2  | 0.18                      | 0.003                     | 37.65                        | 0.177                        | 474                  |
|       |                           |                           |                              |                              | average: 49±10 nm    |

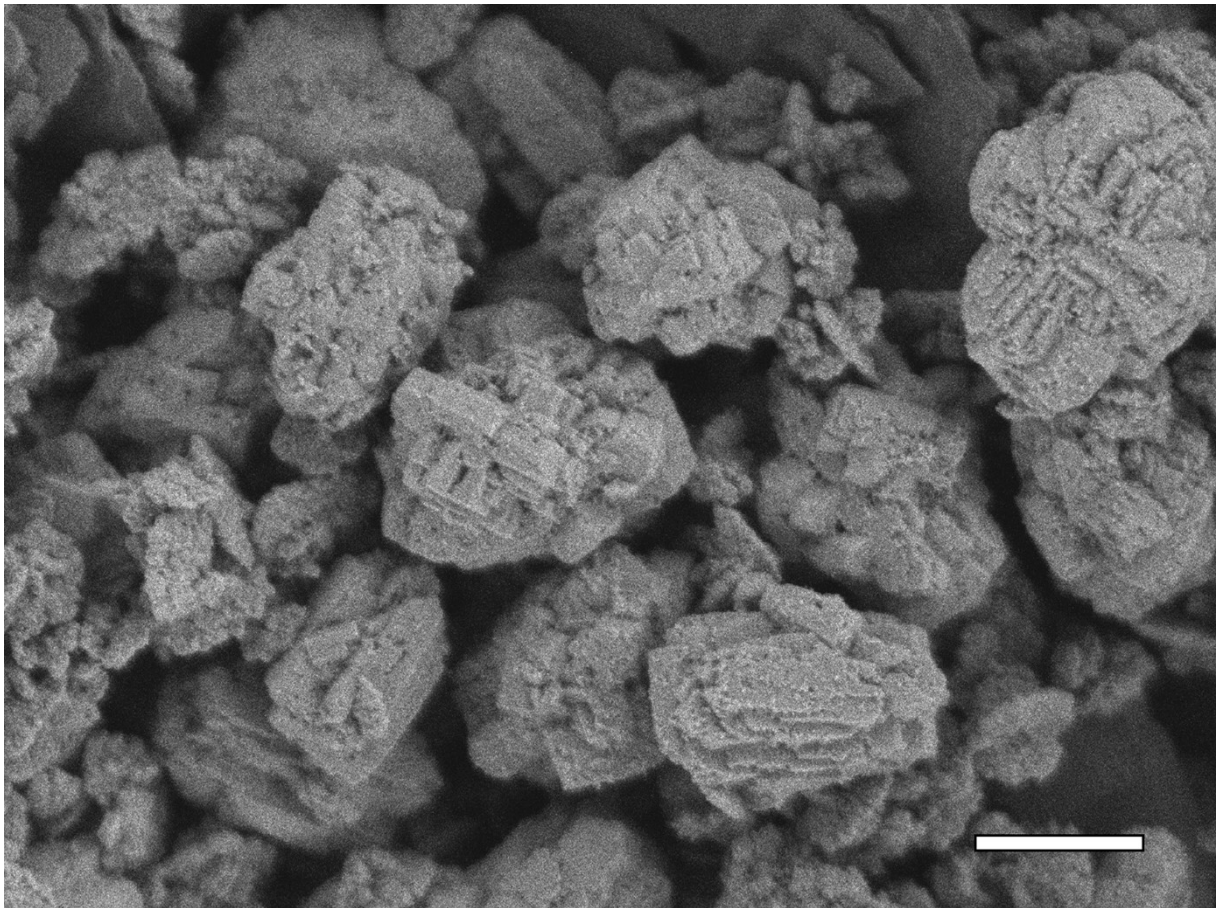

**Figure S3.** SEM images of PHI-14 days. Scale bar is 500 nm.

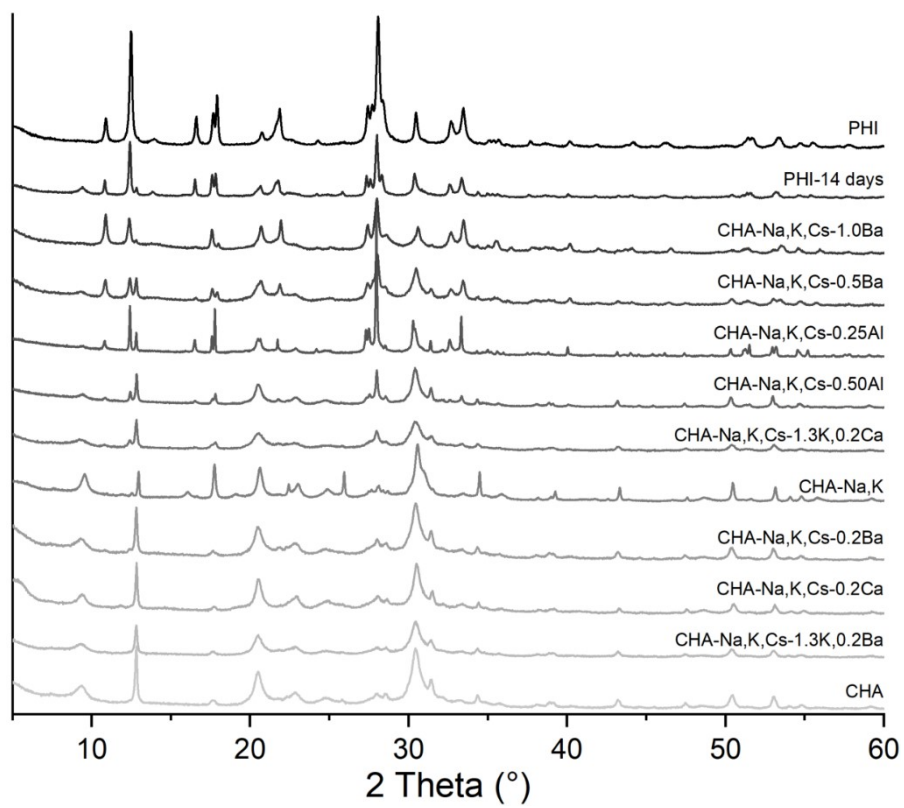

**Figure S4.** Powder XRD patterns of all zeolite samples.

| Sample               | Phase | GOF  | wR (%) | reduced X <sup>2</sup> | a (Å)     | b (Å)     | c (Å)     | beta (°) | Volume (Å <sup>3</sup> ) |
|----------------------|-------|------|--------|------------------------|-----------|-----------|-----------|----------|--------------------------|
| CHA                  | CHA   | 3.42 | 9.683  | 11.67                  | 13.835607 | -         | 15.184503 | -        | 2517.258                 |
| CHA-Na,Cs-1.3K,0.2Ba | CHA   | 3.39 | 9.847  | 11.46                  | 13.800795 | -         | 15.163165 | -        | 2501.086                 |
| CHA-Na,K,Cs-0.2Ca    | CHA   | 3.76 | 8.906  | 14.14                  | 13.779192 | -         | 15.086180 | -        | 2480.604                 |
| CHA-Na,K,Cs-0.2Ba    | CHA   | 3.92 | 8.717  | 15.40                  | 13.803514 | -         | 15.118306 | -        | 2494.670                 |
| CHA-Na,K             | CHA   | 4.44 | 11.506 | 19.70                  | 13.823164 | -         | 15.082600 | -        | 2495.869                 |
| CHA-Na,Cs-1.3K,0.2Ca | CHA   | 3.05 | 8.807  | 9.28                   | 13.777796 | -         | 15.074650 | -        | 2478.206                 |
|                      | PHI   |      |        |                        | 9.943584  | 14.187387 | 8.678807  | 124.8448 | 1004.827                 |
| CHA-Na,K,Cs-0.50Al   | CHA   | 3.14 | 8.691  | 9.85                   | 13.799675 | -         | 15.086954 | -        | 2488.112                 |
|                      | PHI   |      |        |                        | 9.957733  | 14.202910 | 8.702450  | 124.8743 | 1009.740                 |
| CHA-Na,K,Cs-0.25Al   | CHA   | 4.51 | 12.294 | 20.32                  | 13.830740 | -         | 15.083669 | -        | 2498.783                 |
|                      | PHI   |      |        |                        | 9.985948  | 14.261571 | 8.739134  | 125.2619 | 1016.232                 |
| CHA-Na,K,Cs-0.5Ba    | CHA   | 2.89 | 6.596  | 8.38                   | 13.841154 | -         | 15.052657 | -        | 2497.402                 |
|                      | PHI   |      |        |                        | 9.886988  | 14.214983 | 8.705141  | 124.9366 | 1002.967                 |
| CHA-Na,K,Cs-1.0Ba    | CHA   | 2.56 | 5.887  | 6.56                   | 13.829992 | -         | 15.052693 | -        | 2493.381                 |
|                      | PHI   |      |        |                        | 9.870288  | 14.210071 | 8.727031  | 124.8026 | 1005.081                 |
| PHI-14 days          | CHA   | 3.29 | 11.004 | 10.84                  | 13.822081 | -         | 15.069711 | -        | 2493.345                 |
|                      | PHI   |      |        |                        | 9.927806  | 14.204983 | 8.713394  | 124.9560 | 1007.115                 |
| PHI                  | PHI   | 3.08 | 7.252  | 9.5                    | 9.916595  | 14.202499 | 8.717479  | 125.0690 | 1004.884                 |

**Table S3.** Le Bail refined unit cell parameters of the chabazite and phillipsite zeolites.

**Table S4.** Chemical composition of the chabazite and phillipsite nanozeolites determined by ICP-MS. \*Due to the co-existence of  $\text{Ca}(\text{OH})_2$  precipitates the amount of  $\text{Ca}^{2+}$  cations present in the CHA unit cell was estimated (see *Advanced Sustainable Systems* **2024**, 8 (1), 2300326).

| ICP-MS Chemical composition |     |     |          |     |          |      |      |       |         |
|-----------------------------|-----|-----|----------|-----|----------|------|------|-------|---------|
|                             | Cs  | K   | Na       | Ba  | Ca       | Si   | Al   | Si/Al | CHA/PHI |
| CHA                         | 3.1 | 5.7 | 2.5      | -   | -        | 24.7 | 11.3 | 2.2   | 1.00    |
| Chabazite <sup>60</sup>     | 6.6 | 3.6 | 2.4      | -   | -        | 23.4 | 12.6 | 1.9   | 1.00    |
| CHA-Na,Cs-1.3K,0.2Ba        | 3.7 | 5.2 | 1.5      | 0.3 | -        | 24.9 | 11.1 | 2.2   | 1.00    |
| CHA-Na,Cs-1.3K,0.2Ca        | 3.3 | 5.2 | 1.7      | -   | 0.4      | 25.0 | 11.0 | 2.3   | 1.00    |
| CHA-Na,K,Cs-0.2Ca           | 2.7 | 6.0 | 1.8<br>* | -   | 0.6<br>* | 24.3 | 11.7 | 2.1   | 1.00    |
| CHA-Na,K,Cs-0.2Ba           | 3.2 | 5.6 | 1.6      | 0.5 | -        | 24.6 | 11.4 | 2.2   | 1.00    |
| CHA-Na,K                    | -   | 7.7 | 3.5      | -   | -        | 24.5 | 11.2 | 2.2   | 1.00    |
| CHA-Na,K,Cs-0.50Al          | 3.1 | 5.6 | 2.4      | -   | -        | 23.8 | 11.1 | 2.1   | 0.74    |
| CHA-Na,K,Cs-0.25Al          | 2.3 | 5.6 | 3.1      | -   | -        | 24.0 | 11.0 | 2.2   | 0.69    |
| CHA-Na,K,Cs-0.5Ba           | 2.3 | 4.4 | 0.9      | 1.6 | -        | 23.5 | 10.8 | 2.2   | 0.59    |
| CHA-Na,K,Cs-1.0Ba           | 1.4 | 2.1 | -        | 3.4 | -        | 23.2 | 10.3 | 2.3   | 0.42    |
| PHI-14 days                 | -   | 6.1 | 3.2      | -   | 0.7      | 22.6 | 10.7 | 2.1   | 0.29    |
| PHI                         | -   | 5.8 | 3.3      | -   | 0.7      | 21.6 | 10.5 | 2.1   | 0.00    |

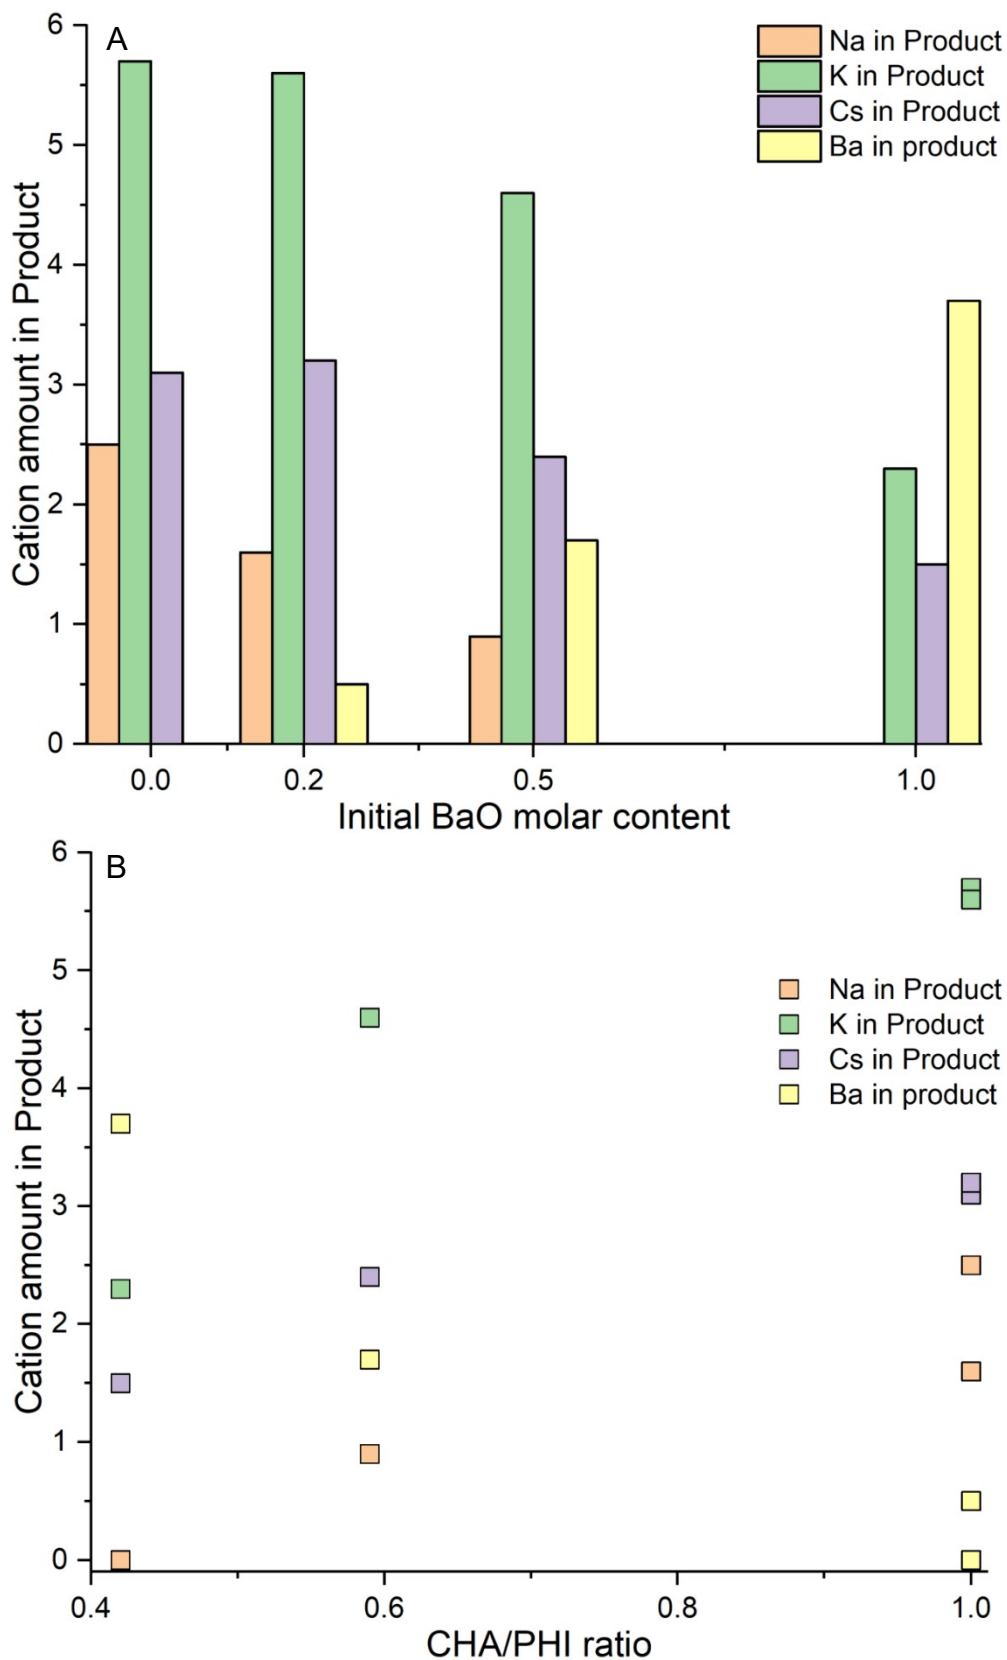

**Figure S5.** Plot of Cs, K, Na, Ba amount over the initial BaO molar content (A) or the CHA/PHI ratio (B), for samples CHA, CHA-Na,K,Cs-0.2Ba, CHA-Na,K,Cs-0.5Ba and CHA-Na,K,Cs-1.0Ba.

**Table S5.** Detailed molar ratio and coordinates of samples presented in the ternary phase diagram.

|                         | CHA:PHI<br>ratio | molar ratio |          |      | %      |          |      |
|-------------------------|------------------|-------------|----------|------|--------|----------|------|
|                         |                  | Al + K      | Ca or Ba | Cs   | Al + K | Ca or Ba | Cs   |
| CHA                     | 1.00             | 2.20        | 0.00     | 0.20 | 0.92   | 0.00     | 0.08 |
| Chabazite <sup>60</sup> | 1.00             | 1.95        | 0.00     | 0.15 | 0.93   | 0.00     | 0.07 |
| CHA-Na,Cs-1.3K,0.2Ba    | 1.00             | 2.00        | 0.20     | 0.20 | 0.83   | 0.08     | 0.08 |
| CHA-Na,Cs-1.3K,0.2Ca    | 0.81             | 2.00        | 0.20     | 0.20 | 0.83   | 0.08     | 0.09 |
| CHA-Na,K,Cs-0.2Ca       | 1.00             | 2.20        | 0.20     | 0.20 | 0.85   | 0.08     | 0.08 |
| CHA-Na,K,Cs-0.2Ba       | 1.00             | 2.20        | 0.20     | 0.20 | 0.85   | 0.08     | 0.08 |
| CHA-Na,K                | 1.00             | 2.20        | 0.00     | 0.00 | 1.00   | 0.00     | 0.00 |
| CHA-Na,K,Cs-0.50Al      | 0.74             | 2.00        | 0.00     | 0.20 | 0.91   | 0.00     | 0.09 |
| CHA-Na,K,Cs-0.25Al      | 0.69             | 1.76        | 0.00     | 0.20 | 0.90   | 0.00     | 0.10 |
| CHA-Na,K,Cs-0.5Ba       | 0.59             | 2.20        | 0.50     | 0.20 | 0.76   | 0.17     | 0.07 |
| CHA-Na,K,Cs-1.0Ba       | 0.42             | 2.20        | 1.00     | 0.20 | 0.65   | 0.29     | 0.06 |
| PHI*                    | 0.00             | 2.20        | 0.20     | 0.00 | 0.92   | 0.08     | 0.00 |

\*PHI-14 days is not included as its precursor chemical composition is the same as PHI

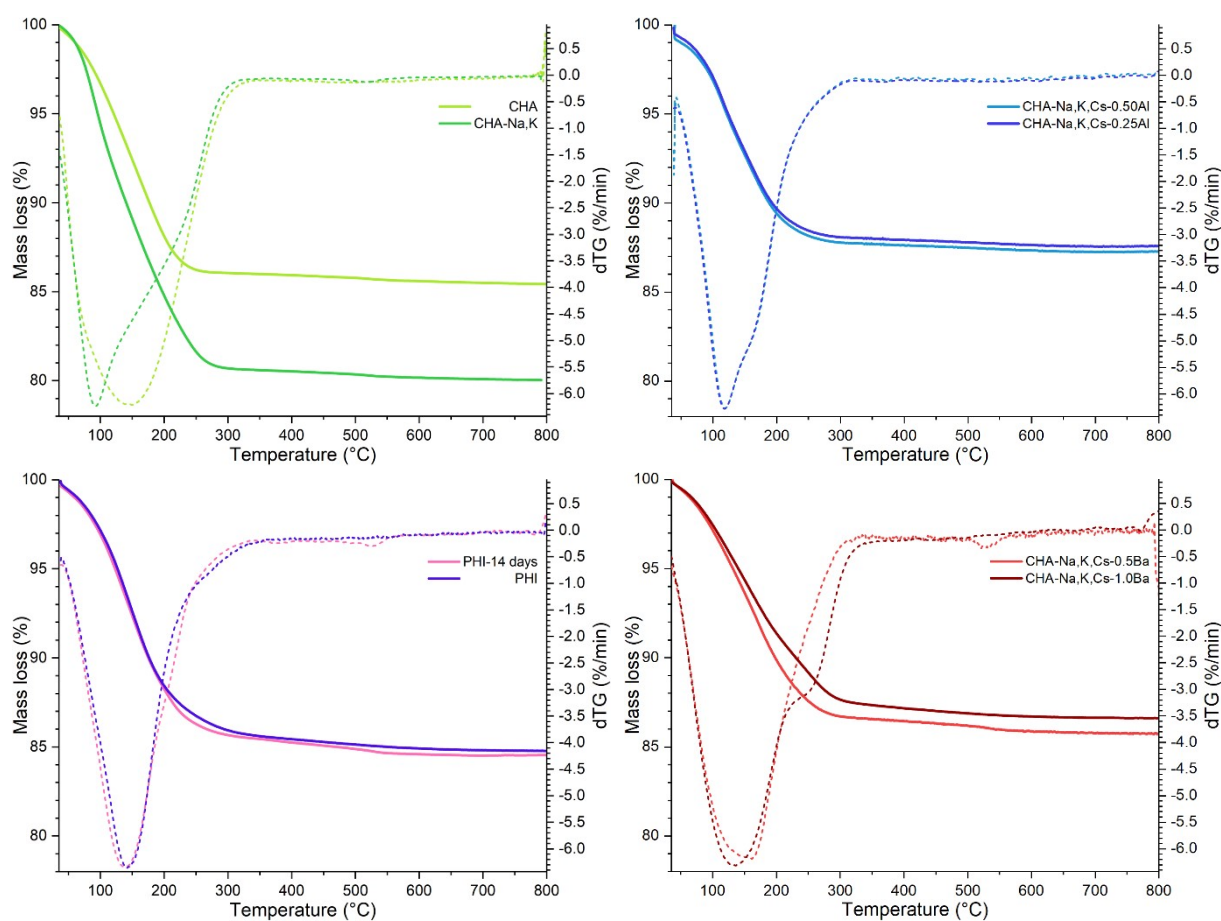

**Figure S6.** Thermogravimetric (solid) and differential thermogravimetric (dotted) curves of all zeolite samples.



**Table S6.** Mass loss at 800 °C of all nanosized zeolites calculated from thermogravimetric analysis.

|                       | Mass loss at 800 °C |
|-----------------------|---------------------|
| CHA*                  | 14.5 %              |
| CHA-Na,Cs-1.3K,0.2Ba* | 14.3 %              |
| CHA-Na,Cs-1.3K,0.2Ca* | 14.7 %              |
| CHA-Na,K,Cs-0.2Ca*    | 14.3 %              |
| CHA-Na,K,Cs-0.2Ba*    | 14.7 %              |
| CHA-Na,K              | 19.9 %              |
| CHA-Na,K,Cs-0.50Al    | 12.8 %              |
| CHA-Na,K,Cs-0.25Al    | 12.4 %              |
| CHA-Na,K,Cs-0.5Ba     | 14.3 %              |
| CHA-Na,K,Cs-1.0Ba     | 13.4 %              |
| PHI-14 days           | 15.4 %              |
| PHI                   | 15.2 %              |

\* Samples described in *Advanced Sustainable Systems* **2024**, 8 (1), 2300326.

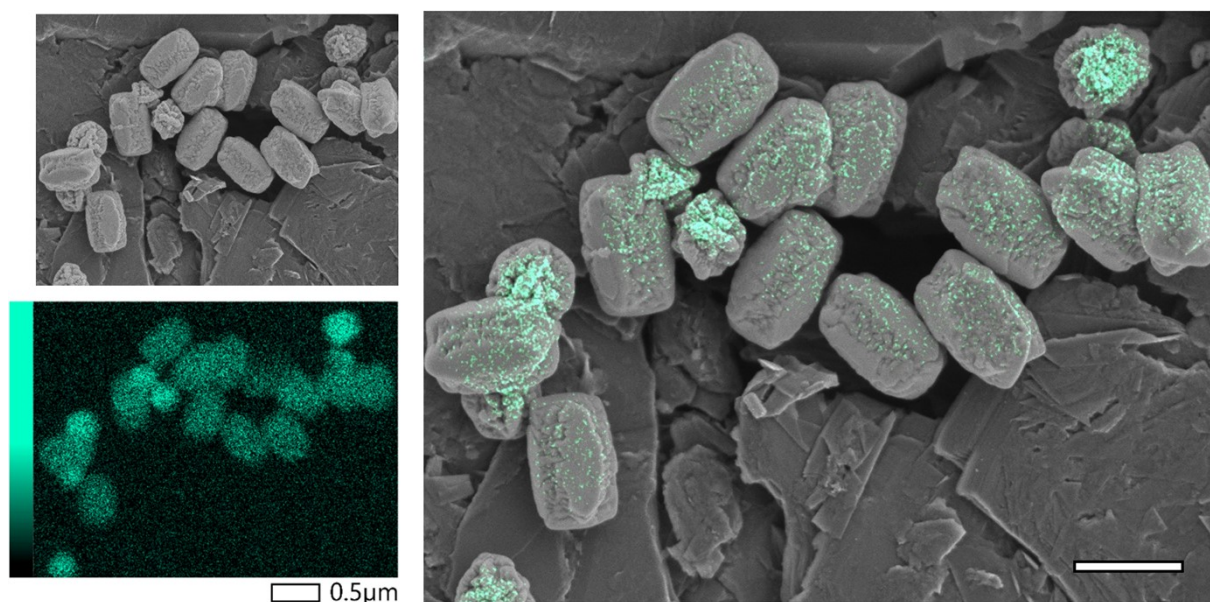

**Figure S7.** SEM picture and EDS mapping of caesium in the sample CHA-Na,K,Cs-0.25Al (left), overlay of the SEM and EDS pictures highlighting the greater amount of caesium in chabazite crystals (right). Scale bar is 500 nm.

**Table S7.** BET specific surface areas and microporous volumes of the synthesised nanozeolites from N<sub>2</sub> adsorption isotherms recorded at -196°C.

|                       | BET specific surface areas (m <sup>2</sup> /g) | Microporous volumes (cm <sup>3</sup> /g) |
|-----------------------|------------------------------------------------|------------------------------------------|
| CHA*                  | 136                                            | 0.04                                     |
| CHA-Na,Cs-1.3K,0.2Ba* | 155                                            | 0.04                                     |
| CHA-Na,Cs-1.3K,0.2Ca* | 172                                            | 0.04                                     |
| CHA-Na,K,Cs-0.2Ca*    | 290                                            | 0.07                                     |
| CHA-Na,K,Cs-0.2Ba*    | 169                                            | 0.05                                     |
| CHA-Na,K              | 233                                            | 0.06                                     |
| CHA-Na,K,Cs-0.50Al    | 83                                             | 0.02                                     |
| CHA-Na,K,Cs-0.25Al    | 24                                             | 0.00                                     |
| CHA-Na,K,Cs-0.5Ba     | 98                                             | 0.03                                     |
| CHA-Na,K,Cs-1.0Ba     | 66                                             | 0.02                                     |
| PHI-14 days           | 86                                             | 0.03                                     |
| PHI                   | 60                                             | 0.00                                     |

\* Samples described in *Advanced Sustainable Systems* **2024**, 8 (1), 2300326.

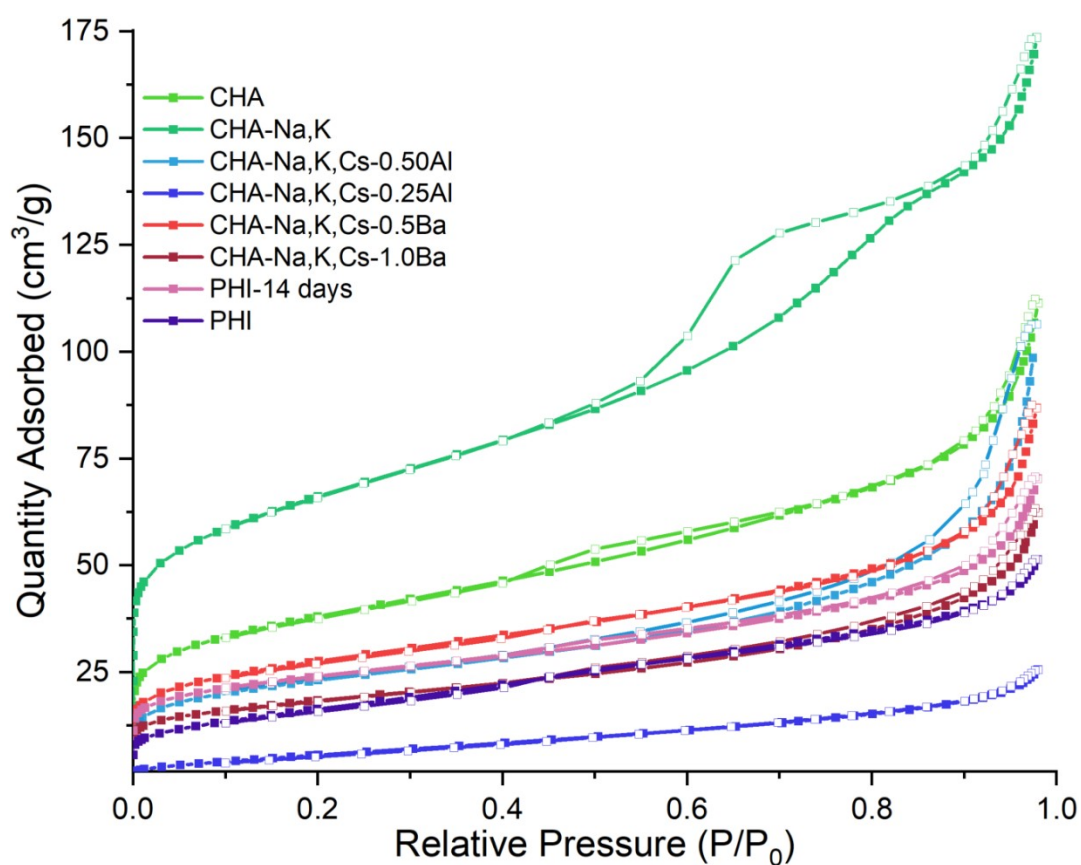

**Figure S8.** N<sub>2</sub> adsorption (full symbols) and desorption (empty symbols) isotherms of all zeolite samples measured at -196 °C.

**Pareto Chart of the Standardized Effects**  
(response is CO<sub>2</sub>;  $\alpha = 0.15$ )

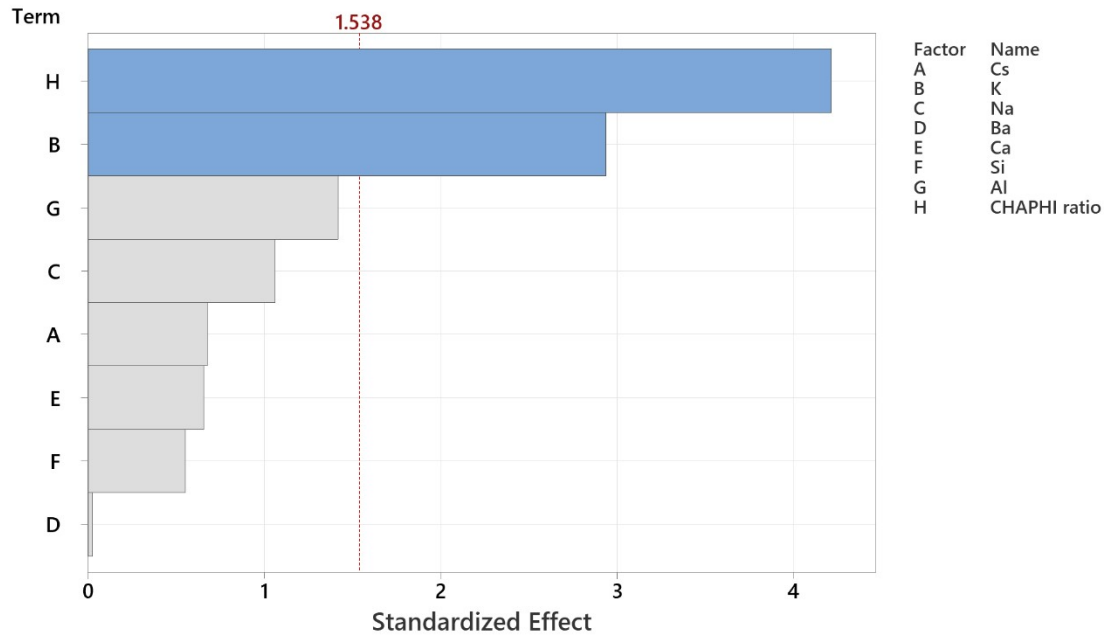

*A gray bar represents a term not in the model.*

**Coded Coefficients**

| Term         | Coef  | SE Coef | T-Value | P-Value | VIF  |
|--------------|-------|---------|---------|---------|------|
| Constant     | 2.267 | 0.252   | 8.99    | 0.000   |      |
| K            | 1.275 | 0.434   | 2.93    | 0.013   | 1.13 |
| CHAPHI ratio | 1.201 | 0.285   | 4.21    | 0.001   | 1.13 |

**Figure S9.** Pareto chart of the standardised effects of elements from ICP-MS and CHA/PHI ratio from RiR method on the CO<sub>2</sub> adsorption capacity at 90 kPa. Based on a screening design model, parameters H and B are statistically significant at the 15% threshold (CHA/PHI ratio uncertainty) using the terms of the current model, computed by Minitab.
